# Supplementary material for: Characterization of TLR4/MD-2-modified Au sensor surfaces towards the detection of molecular signatures of bacteria
Source: Royal Society of Chemistry journal article supplement (doi:10.1039/c6ay01978a), 2016-01-01
Supplement: c6ay01978a1.pdf [file c6ay01978a1.pdf]

## Supplemental Information

### **Characterization of TLR4/MD-2-modified Au sensor surfaces. Towards the detection of molecular signatures of bacteria.**

Kaveh Amini<sup>1</sup>, Iraklii I. Ebralidze<sup>1</sup>, Nora W.C. Chan<sup>2</sup>, Heinz-Bernhard Kraatz<sup>1</sup> \*

<sup>1</sup>*Department of Physical and Environmental Sciences, University of Toronto  
Scarborough, Toronto, ON, Canada*

<sup>2</sup>*Defence Research and Development Canada - Suffield Research Centre  
PO Box 4000 Station Main, Medicine Hat, Alberta, T1A 8K6, Canada*

\* Corresponding author email: [bernie.kraatz@utoronto.ca](mailto:bernie.kraatz@utoronto.ca); fax: (+1) 416-287-7279

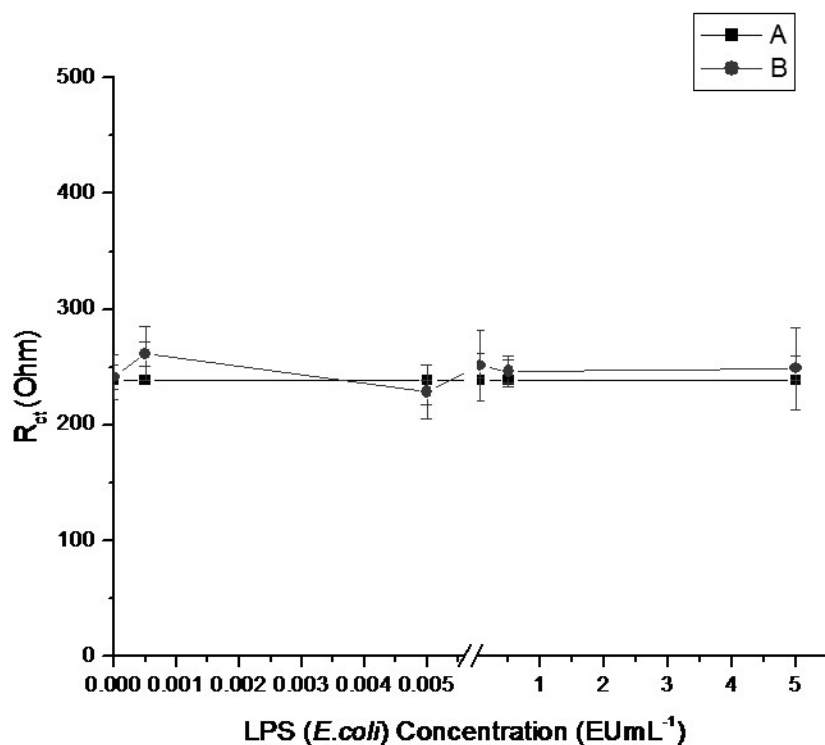

**Fig. S 1** Investigation of the electrochemical behaviour of the Lip-NHS modified Au electrode LPS (*E. coli*). (A) Shows the  $R_{ct}$  value obtained for incubation in the absence of LPS and has been provided for comparison and (B) show the  $R_{ct}$  values for incubation at different concentrations of LPS

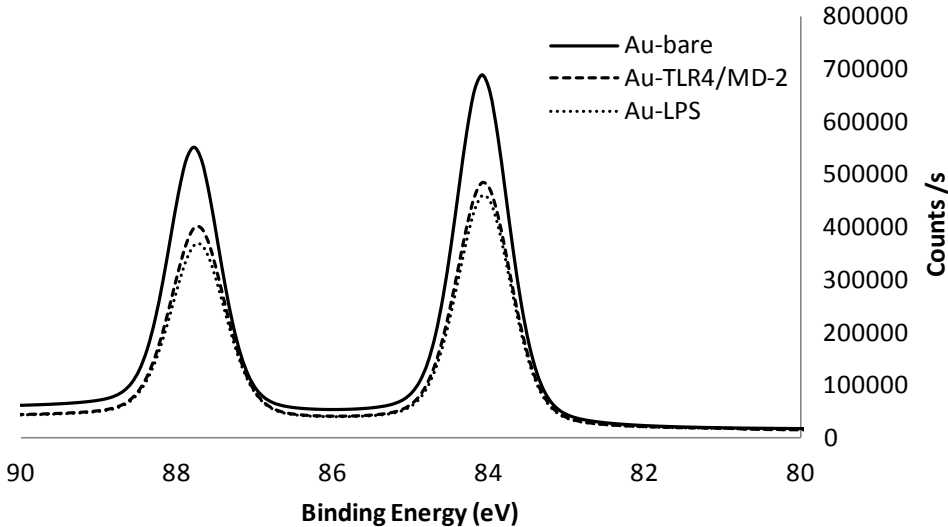

**Fig. S 2** Au 4d XPS signals for bare Au, TLR4/MD-2-modified Au and LPS/TLR4-MD-2-modified Au. The attenuation of these Au 4d signals have been used for estimating the overlayer thicknesses.

**Table S1** Equivalent circuit element values for TLR4/MD-2-modified electrodes after incubation in LPS from *E. coli* solutions at different concentrations. Values in parentheses represent the standard deviation for at least 5 electrode measurements.

| Equivalent Circuit elements (LPS <i>E.coli</i> ) |                                        |                                      |                                         |                                               |        |                                         |                                        |
|--------------------------------------------------|----------------------------------------|--------------------------------------|-----------------------------------------|-----------------------------------------------|--------|-----------------------------------------|----------------------------------------|
| LPS Concentration<br>(EUmL <sup>-1</sup> )       | R <sub>s</sub><br>(Ω·cm <sup>2</sup> ) | Capacitanc<br>e (F/cm <sup>2</sup> ) | R <sub>dl</sub><br>(Ω·cm <sup>2</sup> ) | CPE<br>(F/s <sup>1/2</sup> ·cm <sup>2</sup> ) | n      | R <sub>ct</sub><br>(Ω·cm <sup>2</sup> ) | W (μF <sup>1/2</sup> cm <sup>2</sup> ) |
| 0                                                | 0.8                                    | 1.4 × 10 <sup>-5</sup>               | 1.4                                     | 5.2 × 10 <sup>-5</sup>                        | 0.8    | 250.8                                   | 0.02                                   |
|                                                  | (0.5)                                  | (3.5 × 10 <sup>-6</sup> )            | (0.1)                                   | (1.5 × 10 <sup>-5</sup> )                     | (0.02) | (11.3)                                  | (0.01)                                 |
| 0.0005                                           | 1.0                                    | 1.4 × 10 <sup>-5</sup>               | 1.4                                     | 6.8 × 10 <sup>-5</sup>                        | 0.8    | 261.2                                   | 0.01                                   |
|                                                  | (0.6)                                  | (5.6 × 10 <sup>-6</sup> )            | (0.1)                                   | (9.5 × 10 <sup>-6</sup> )                     | (0.01) | (22.3)                                  | (0.01)                                 |
| 0.005                                            | 0.6                                    | 1.8 × 10 <sup>-5</sup>               | 1.4                                     | 9.0 × 10 <sup>-5</sup>                        | 0.8    | 375.6                                   | 0.02                                   |
|                                                  | (0.6)                                  | (3.8 × 10 <sup>-6</sup> )            | (0.2)                                   | (5.1 × 10 <sup>-6</sup> )                     | (0.01) | (18.7)                                  | (0.01)                                 |
| 0.05                                             | 1.1                                    | 1.4 × 10 <sup>-5</sup>               | 1.4                                     | 7.2 × 10 <sup>-5</sup>                        | 0.8    | 543.5                                   | 0.01                                   |
|                                                  | (0.8)                                  | (8.6 × 10 <sup>-6</sup> )            | (0.1)                                   | (6.9 × 10 <sup>-6</sup> )                     | (0.01) | (24.3)                                  | (0.02)                                 |
| 0.5                                              | 1.0                                    | 1.6 × 10 <sup>-5</sup>               | 1.4                                     | 4.5 × 10 <sup>-5</sup>                        | 0.8    | 712.6                                   | 0.01                                   |
|                                                  | (0.5)                                  | (4.6 × 10 <sup>-6</sup> )            | (0.1)                                   | (7.6 × 10 <sup>-6</sup> )                     | (0.01) | (29.1)                                  | (0.01)                                 |
| 5                                                | 1.5                                    | 1.3 × 10 <sup>-5</sup>               | 1.5                                     | 4.5 × 10 <sup>-5</sup>                        | 0.8    | 960.3                                   | 0.02                                   |
|                                                  | (0.6)                                  | (4.5 × 10 <sup>-6</sup> )            | (0.2)                                   | (1.1 × 10 <sup>-5</sup> )                     | (0.03) | (33.5)                                  | (0.02)                                 |

**Table S2** Equivalent circuit element values for TLR4/MD-2-modified electrodes after incubation in LPS from *Salmonella* solutions at different concentrations. Values in parentheses represent the standard deviation for at least 5 electrode measurements.

| Equivalent Circuit elements (LPS ( <i>Salmonella</i> )) |                                        |                                     |                                         |                                               |        |                                         |                                        |
|---------------------------------------------------------|----------------------------------------|-------------------------------------|-----------------------------------------|-----------------------------------------------|--------|-----------------------------------------|----------------------------------------|
| LPS Concentration<br>(EUmL <sup>-1</sup> )              | R <sub>s</sub> (Ω·cm <sup>2</sup><br>) | Capacitance<br>(F/cm <sup>2</sup> ) | R <sub>dl</sub><br>(Ω·cm <sup>2</sup> ) | CPE<br>(F/s <sup>1/2</sup> ·cm <sup>2</sup> ) | n      | R <sub>ct</sub><br>(Ω·cm <sup>2</sup> ) | W (μF <sup>1/2</sup> cm <sup>2</sup> ) |
| 0                                                       | 0.7                                    | 9.9 × 10 <sup>-6</sup>              | 1.8                                     | 1.7 × 10 <sup>-5</sup>                        | 0.8    | 261.8                                   | 0.01                                   |
|                                                         | (0.2)                                  | (5.5 × 10 <sup>-6</sup> )           | (0.3)                                   | (6.3 × 10 <sup>-6</sup> )                     | (0.01) | (14.3)                                  | (0.01)                                 |
| 0.0005                                                  | 0.8                                    | 9.6 × 10 <sup>-6</sup>              | 1.7                                     | 1.9 × 10 <sup>-5</sup>                        | 0.8    | 277.6                                   | 0.01                                   |
|                                                         | (0.2)                                  | (4.2 × 10 <sup>-6</sup> )           | (0.1)                                   | (4.5 × 10 <sup>-6</sup> )                     | (0.01) | (31.3)                                  | (0.01)                                 |
| 0.005                                                   | 1.4                                    | 1.1 × 10 <sup>-5</sup>              | 1.4                                     | 1.6 × 10 <sup>-5</sup>                        | 0.9    | 389.8                                   | 0.01                                   |
|                                                         | (0.8)                                  | (8.8 × 10 <sup>-6</sup> )           | (0.1)                                   | (2.1 × 10 <sup>-6</sup> )                     | (0.02) | (28.7)                                  | (0.01)                                 |
| 0.05                                                    | 0.6                                    | 1.0 × 10 <sup>-5</sup>              | 1.8                                     | 1.4 × 10 <sup>-5</sup>                        | 0.9    | 568.9                                   | 0.01                                   |
|                                                         | (0.5)                                  | (5.3 × 10 <sup>-6</sup> )           | (0.2)                                   | (3.9 × 10 <sup>-6</sup> )                     | (0.01) | (22.4)                                  | (0.02)                                 |
| 0.5                                                     | 1.2                                    | 9.6 × 10 <sup>-6</sup>              | 1.8                                     | 2.5 × 10 <sup>-5</sup>                        | 0.8    | 739.6                                   | 0.03                                   |
|                                                         | (0.4)                                  | (3.9 × 10 <sup>-6</sup> )           | (0.1)                                   | (6.3 × 10 <sup>-6</sup> )                     | (0.02) | (26.8)                                  | (0.01)                                 |
| 5                                                       | 0.8                                    | 9.2 × 10 <sup>-6</sup>              | 1.5                                     | 2.5 × 10 <sup>-5</sup>                        | 0.8    | 1002.3                                  | 0.01                                   |
|                                                         | (0.7)                                  | (3.5 × 10 <sup>-6</sup> )           | (0.2)                                   | (4.6 × 10 <sup>-6</sup> )                     | (0.02) | (38.4)                                  | (0.02)                                 |
